# Supplementary material
Source: publisher figshare collection journal article supplement (https://tandf.figshare.com/ndownloader/files/17459075)
Supplement: Supplementary file 1 [file 17459075]

Supplemental Tables and Figures

Figure S 1. Probability plot for lognormal distribution


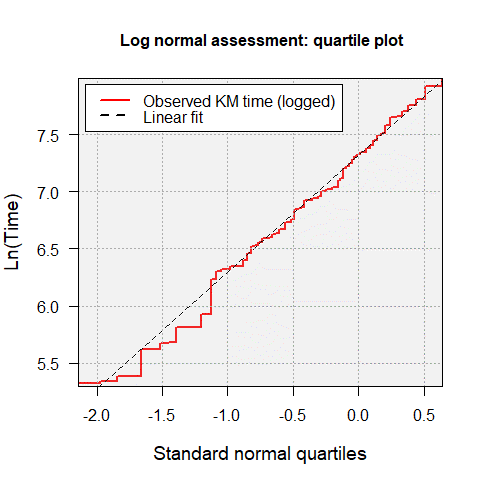


Abbreviation: KM, Kaplan-Meier

Figure S 2. Hazard plot for lognormal distribution


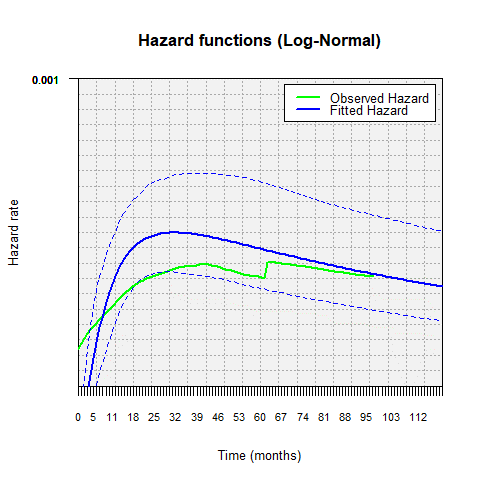


Figure S 3. Observed versus estimated survival


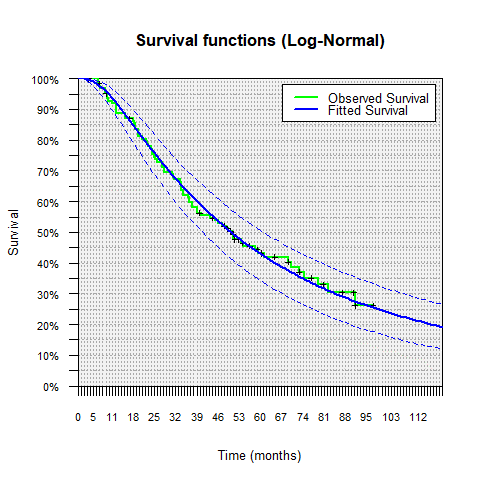


Figure S 4. Time-to-discontinuation


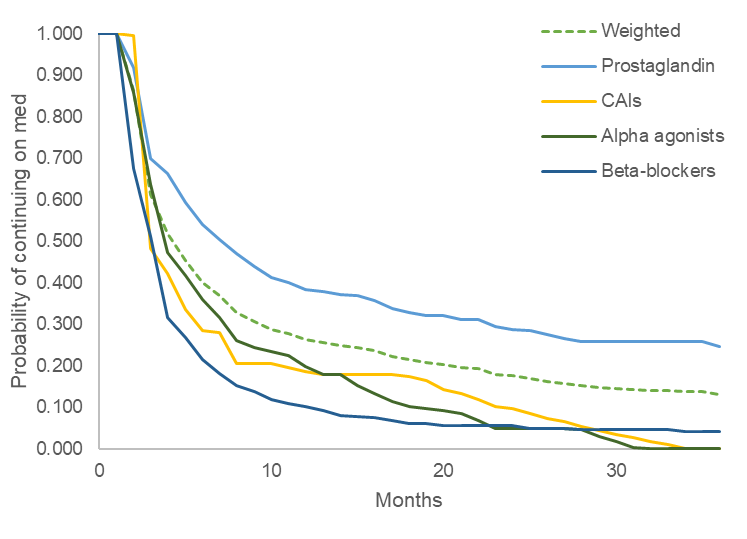


Abbreviation: CAIs, carbonic anhydrase inhibitors.

Table S 1. AIC of distributions

| Distribution | AIC |
| --- | --- |
| Exponential | 1,313 |
| Weibull | 1,308 |
| Gompertz | 1,313 |
| Log-logistic | 1,303 |
| Lognormala | 1,300 |
| Gamma | 1,306 |
| Generalized gamma | 1,301 |

Abbreviations: AIC, Akaike information criterion.

a Parameters to construct the lognormal curve: LogMean = 7.3343; LogStdDeviation = 0.9969.
